# Supplementary material
Source: Springer Nature journal article supplement (https://www.springermedizin.de/resource/supplementary/12905_2009_198_MOESM3_ESM.pdf/9518156)

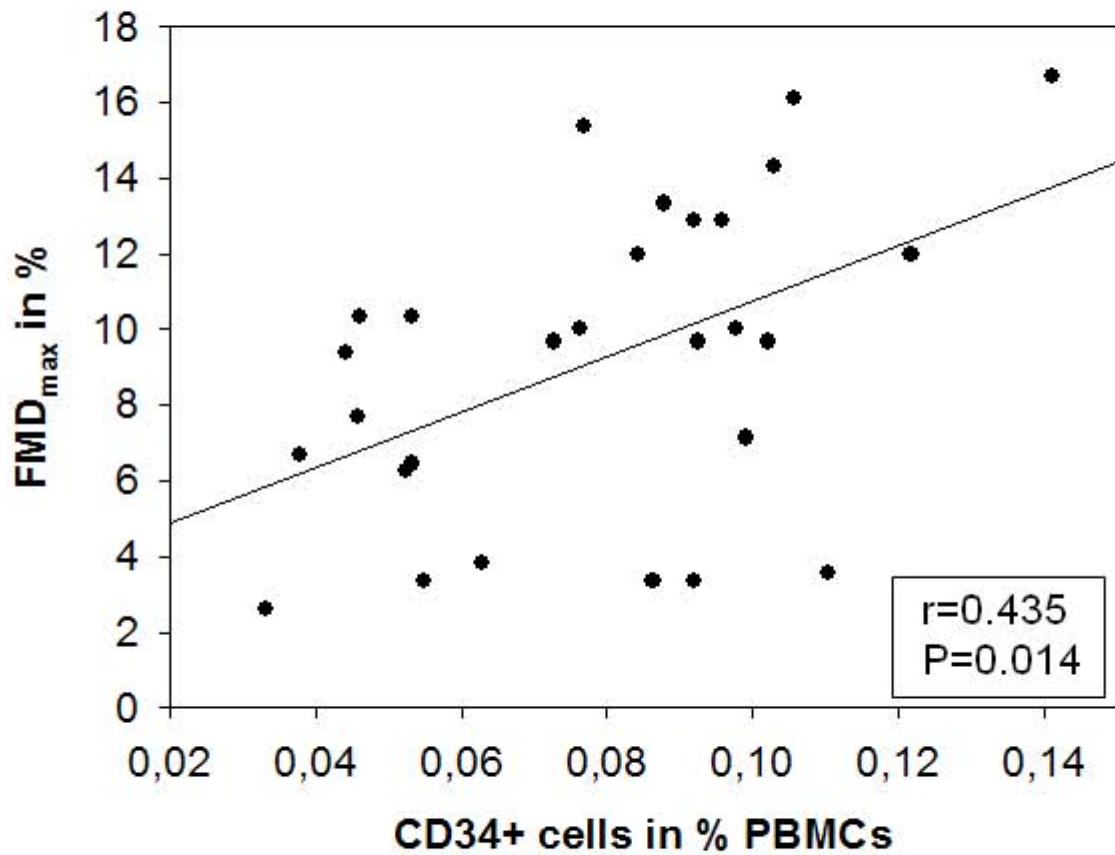

Supplement: MOESM3 [file 9518156]
